# Supplementary material for: Reduced graphene oxide supported C3N4 nanoflakes and quantum dots as metal-free catalysts for visible light assisted CO2 reduction
Source: publisher site journal article supplement (doi:10.3762/bjnano.10.44), 2019-02-13
Supplement: Additional file 1 [file 2190-4286-10-44-S1.pdf]

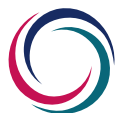

## Supporting Information

for

### **Reduced graphene oxide supported C<sub>3</sub>N<sub>4</sub> nanoflakes and quantum dots as metal-free catalysts for visible light assisted CO<sub>2</sub> reduction**

Md Rakibuddin and Haekyoung Kim

*Beilstein J. Nanotechnol.* **2019**, *10*, 448–458. [doi:10.3762/bjnano.10.44](https://doi.org/10.3762/bjnano.10.44)

## Additional figures

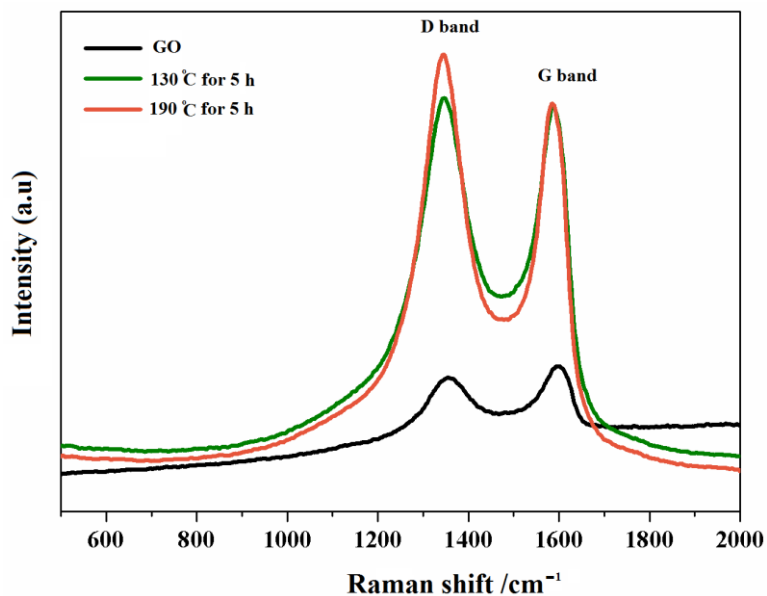

**Figure S1:** Raman spectra of GO samples at different heating temperatures.

The characteristic D band ( $1356\text{ cm}^{-1}$ ), and G band ( $1597\text{ cm}^{-1}$ ) of GO were blue shifted to  $1345\text{ cm}^{-1}$  and  $1586\text{ cm}^{-1}$ , respectively, after the hydrothermal treatment. The intensity ratio of the D and G bands,  $I_D/I_G$ , increases from 0.96 to 1.12 due to the increase in the number of isolated  $\text{sp}^2$  domains. All these information indicates partial reduction of GO to RGO.

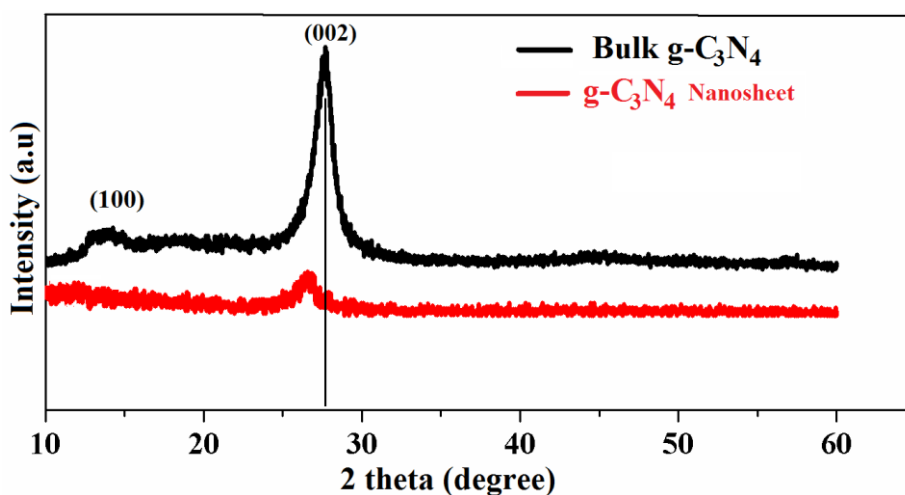

**Figure S2:** PXRD pattern of  $\text{g-C}_3\text{N}_4$  bulk and nanosheet.

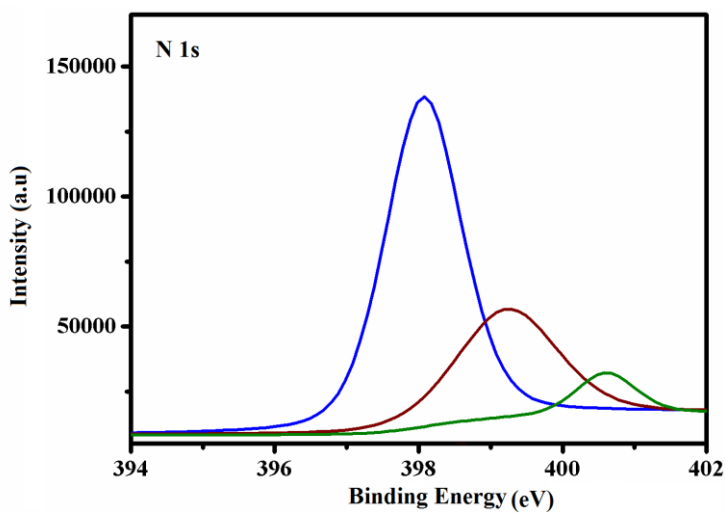

**Figure S3:** XPS fitting of N 1s of the pure g-C<sub>3</sub>N<sub>4</sub>.

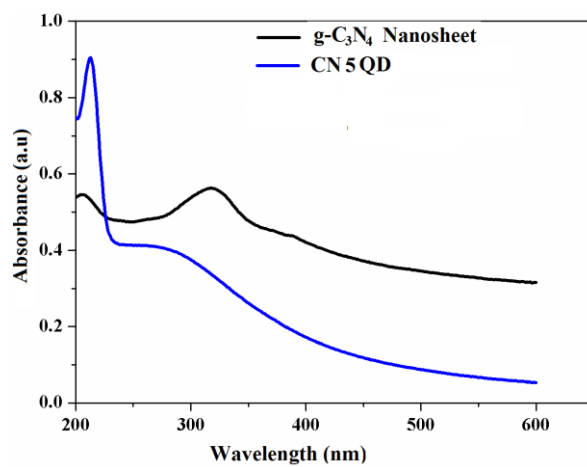

**Figure S4:** UV-visible spectra of the g-C<sub>3</sub>N<sub>4</sub> nanosheet and CN-5 QD in water.

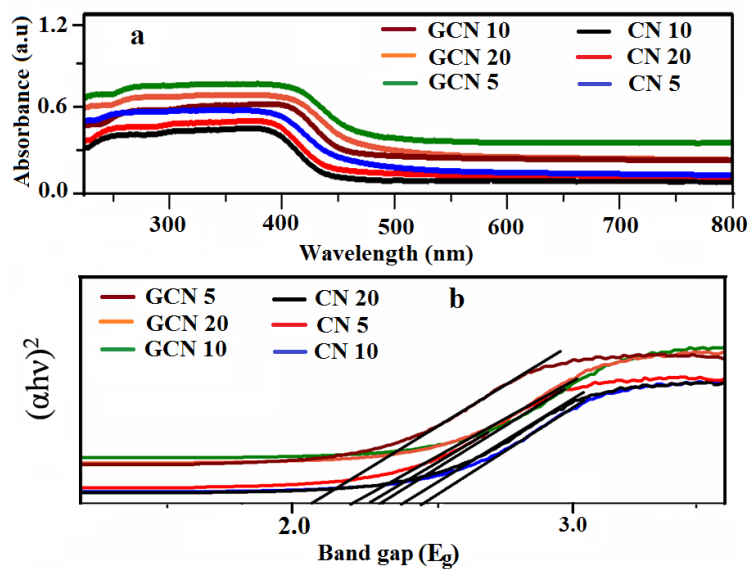

**Figure S5:** a) UV–visible spectra and b) Tauc plot of the CN and GCN NFs/QDs for determination of band gap.

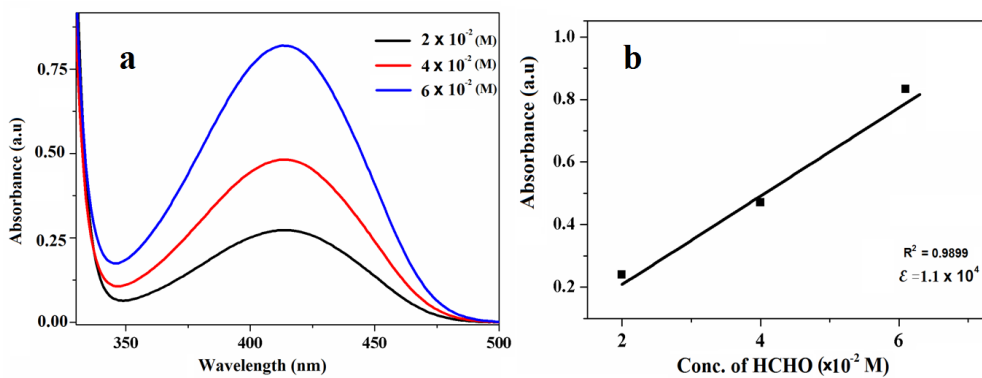

**Figure S6:** Standard calibration curve for determination of concentration of HCHO.

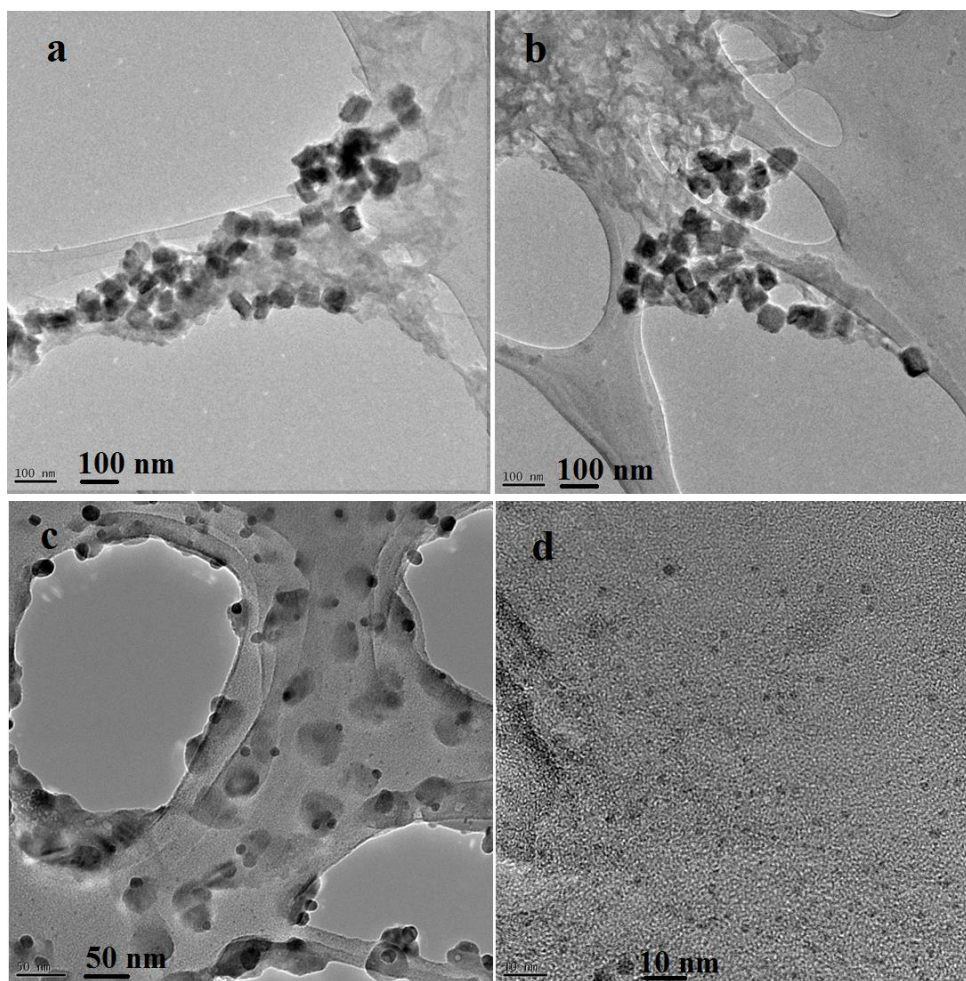

**Figure S7:** TEM image of the CN QDs at 130 °C for 5 h (a,b) and 190 °C for 10 h (c,d).

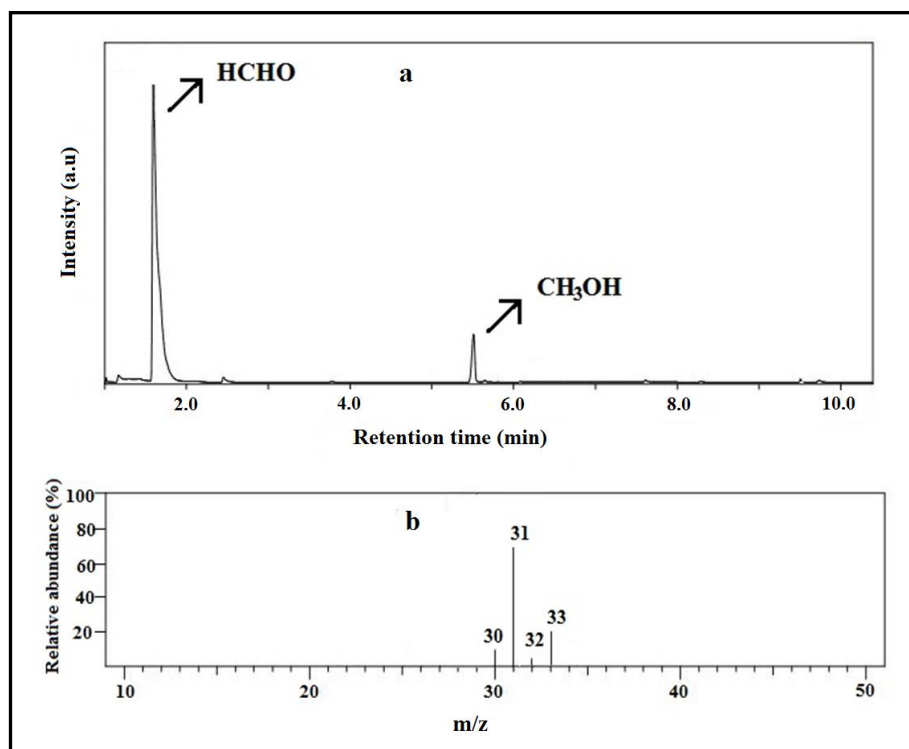

**Figure S8:** a) GC spectrum of the sample collected after 4 h of photoreaction in the presence of GCN-5, and b) GC-MS spectrum of photo-reacted sample treated with  $^{13}\text{CO}_2$ .
